# Supplementary material for: Measurement Report: Wintertime new particle formation in the rural area of North China Plain: influencing factors and possible formation mechanism
Source: Copernicus journal article supplement (doi:10.5194/acp-2022-784), 2022-12-15
Supplement: Supplementary file 1 [file acp-2022-784-supplement.pdf]

Supplement for:

**Measurement Report: Wintertime new particle formation in the rural area of North China Plain: influencing factors and possible formation mechanism**

**Juan Hong<sup>1,2†\*</sup>, Min Tang<sup>1,2†</sup>, Qiaoqiao Wang<sup>1,2\*</sup>, Nan Ma<sup>1,2</sup>, Shaowen Zhu<sup>1,2</sup>, Shaobin Zhang<sup>1,2</sup>, Xihao Pan<sup>1,2</sup>, Linhong Xie<sup>1,2</sup>, Guo Li<sup>3</sup>, Uwe Kuhn<sup>3</sup>, Chao Yan<sup>4</sup>, Jiangchuan Tao<sup>1,2</sup>, Ye Kuang<sup>1,2</sup>, Yao He<sup>1,2</sup>, Wanyun Xu<sup>5</sup>, Runlong Cai<sup>6</sup>, Yaqing Zhou<sup>1,2</sup>, Zhibin Wang<sup>7</sup>, Guangsheng Zhou<sup>5</sup>, Bin Yuan<sup>1</sup>, Yafang Cheng<sup>3</sup>, Hang Su<sup>3</sup>**

<sup>1</sup>Institute for Environmental and Climate Research, Jinan University, Guangzhou, Guangdong 511443, China

<sup>2</sup>Guangdong-Hongkong-Macau Joint Laboratory of Collaborative Innovation for Environmental Quality, Guangzhou, China

<sup>3</sup>Multiphase Chemistry Department, Max Planck Institute for Chemistry, Mainz 55128, Germany

<sup>4</sup>School of Atmospheric Sciences, Joint International Research Laboratory of Atmospheric and Earth System Sciences, Nanjing University, Nanjing, China

<sup>5</sup>Hebei Gucheng, Agrometeorology, National Observation and Research Station, Chinese Academy of Meteorological Sciences, Beijing, 100081, China

<sup>6</sup>Institute for Atmospheric and Earth System Research/Physics, Faculty of Science, University of Helsinki, Helsinki, FI00014, Finland

<sup>7</sup>College of Environmental and Resource Sciences, Zhejiang University, Zhejiang Provincial Key Laboratory of Organic Pollution Process and Control, Hangzhou 310058, China

<sup>†</sup>These authors contributed equally to this work.

\*Correspondence: Qiaoqiao Wang ([qwang@jnu.edu.cn](mailto:qwang@jnu.edu.cn)) and Juan Hong ([juanhong0108@jnu.edu.cn](mailto:juanhong0108@jnu.edu.cn))

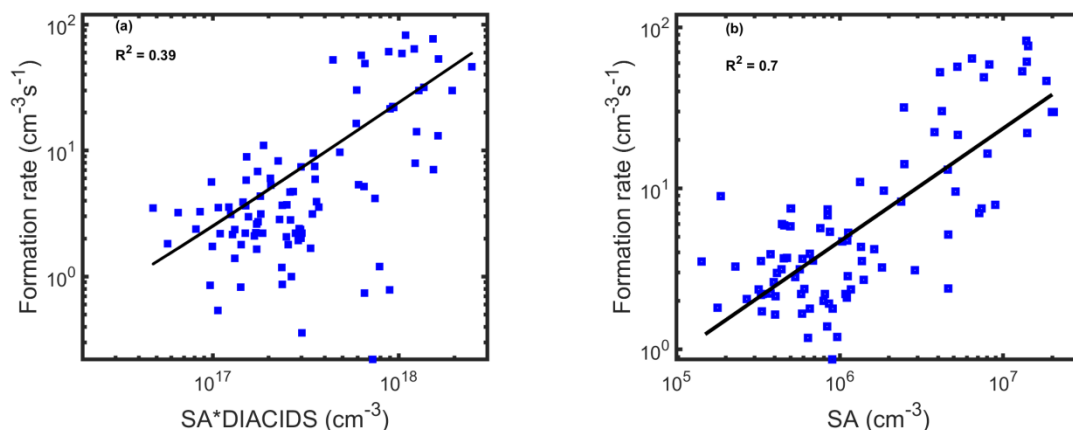

Figure S1: Left panel: Particle formation rate as a function of SA concentration. Right panel: Particle formation rate as a function of the product of SA concentration and diacids concentration ( $\text{C}_6\text{H}_8\text{O}_8$ ,  $\text{C}_7\text{H}_{10}\text{O}_8$ ,  $\text{C}_8\text{H}_{12}\text{O}_8$ , and  $\text{C}_9\text{H}_{14}\text{O}_8$ ). Diacids concentration were measured by a iodine-based chemical ionization-atmospheric pressure interface-time-of-flight (I-API-TOF, Aerodyne Research Inc., USA). R represents the correlation coefficient.

68  
69

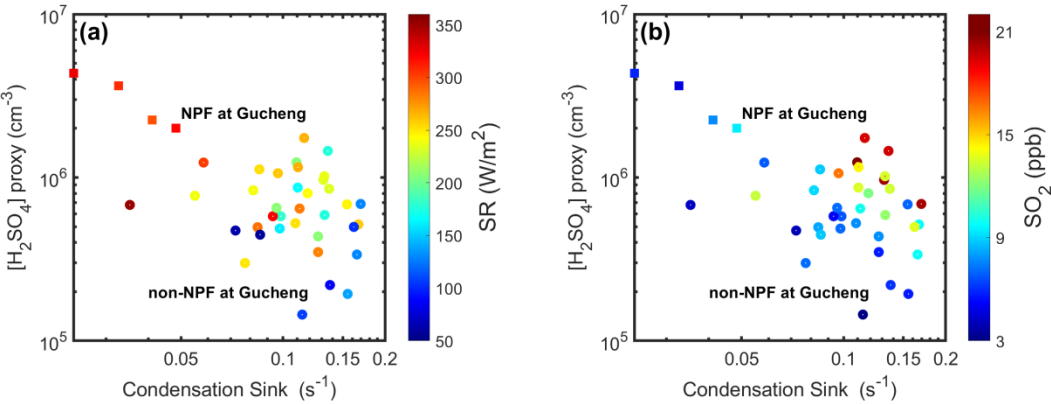

70  
71 Figure S2: H2SO4 concentration as a function of condensation sink during both event days  
72 (square dots) and no-event days (circular dots) during our study. The colorbar indicates: solar  
73 radiation (left panel) and SO2 concentration (right panel).
